# Supplementary material for: Newborn Screening for Spinal Muscular Atrophy in China Using DNA Mass Spectrometry
Source: PubMed Central journal article supplement (PMC6928056; doi:10.3389/fgene.2019.01255), 2019-12-17

**Confidence Intervals for One Proportion - New**  
**Numeric Results for Two-Sided Confidence Intervals for One Proportion**  
**Confidence Interval Formula: Exact (Clopper-Pearson)**

| <b>Confidence Level</b> | <b>Sample Size (N)</b> | <b>Target Width</b> | <b>Actual Width</b> | <b>Proportion (P)</b> | <b>Lower Limit</b> | <b>Upper Limit</b> | <b>Width if P = 0.5</b> |
|-------------------------|------------------------|---------------------|---------------------|-----------------------|--------------------|--------------------|-------------------------|
| 0.950                   | 19046                  | 0.000               | 0.000               | 0.000                 | 0.000              | 0.000              | 0.014                   |

**References**

Fleiss, J. L., Levin, B., Paik, M.C. 2003. Statistical Methods for Rates and Proportions. Third Edition. John Wiley & Sons. New York.

Newcombe, R. G. 1998. 'Two-Sided Confidence Intervals for the Single Proportion: Comparison of Seven Methods.' Statistics in Medicine, 17, pp. 857-872.

**Report Definitions**

Confidence level is the proportion of confidence intervals (constructed with this same confidence level, sample size, etc.) that would contain the population proportion.

N is the size of the sample drawn from the population.

Width is the distance from the lower limit to the upper limit.

Target Width is the value of the width that is entered into the procedure.

Actual Width is the value of the width that is obtained from the procedure.

Proportion (P) is the assumed sample proportion.

Lower Limit is the lower limit of the confidence interval.

Upper Limit is the upper limit of the confidence interval.

Width if P = 0.5 is the maximum width for a confidence interval with sample size N.

**Summary Statements**

A sample size of 19046 produces a two-sided 95% confidence interval with a width equal to 0.000 when the sample proportion is 0.000.

### Confidence Intervals for One Proportion - New

#### Chart Section

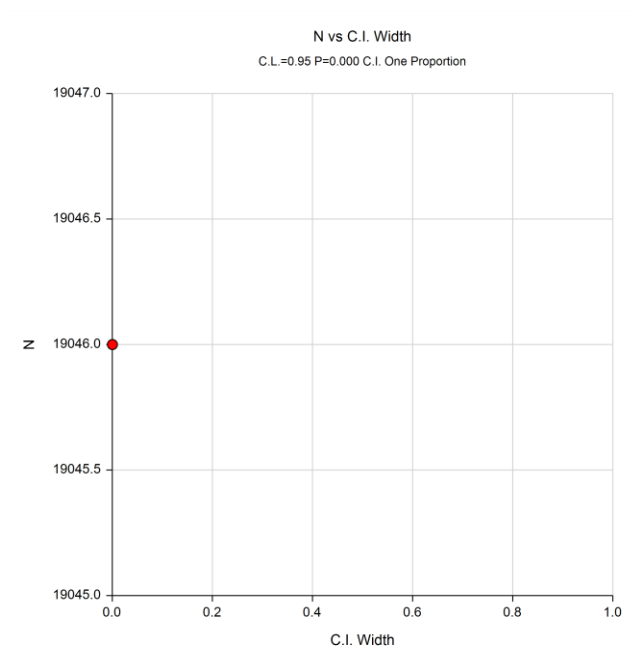

Supplement: DataSheet_1.pdf [file DataSheet_1.pdf]
